# Supplementary material for: Global Prevalence and Major Risk Factors of Diabetic Retinopathy
Source: Oxford University Press journal article supplement (doi:10.2337/dc11-1909), 2012-02-02
Supplement: dc111909supplementarydata.pdf [file dc111909supplementarydata.pdf]

## SUPPLEMENTARY DATA

### The META-EYE Study Group

Joanne WY Yau, MBBS(Hons), Sophie L. Rogers, MEpid, Ryo Kawasaki, PhD, Ecosse L. Lamoureux, PhD, Tien Y Wong, PhD (Centre for Eye Research Australia, University of Melbourne, Royal Victorian Eye and Ear Hospital, Australia); Jonathan W Kowalski, PharmD, Suresh Mahabhashyam, MD, Wei-Shi Yeh, PhD (Global Health Outcomes Strategy and Research, Allergan Inc. U.S.A); Tin Aung, PhD, Seang Mei Saw, PhD, Wanting Tay, BSc, Wanling Wong, MSc (Singapore Eye Research Institute, Singapore National Eye Centre, Singapore); Francesco Panero, MD, Massimo Porta, PhD, Graziella Bruno, MD (Department of Internal Medicine, University of Turin, Italy); Supak Caengow, MSc (Phramongkutklao College of Medicine, Office of Research Development, Thailand); Nawarat Somthip, NP, Nahathai Chuikarat, NP (Department of Social Medicine, Samutsakhon general Hospital, Thailand), Molee Wanichsuwan, MD, Korapat Mayurasakorn, MD (Department of Social Medicine, Samutsakhon General Hospital, Thailand); Shih-Jen Chen, MD, Ching-Yu Cheng, MD (Department of Ophthalmology, Taipei Veterans General Hospital, Taiwan); Pesus Chou, MD (Community Medicine Research Center and Institute of Public Health, National Yang-Ming University, Taiwan); Wen-Ming Hsu, MD (Department of Ophthalmology, Shuang Ho Hospital Taipei Medical University, Taiwan); Jorn-Hon Liu, MD (Department of Ophthalmology, Taipei Veterans General Hospital, National Yang-Ming University, Taiwan); Usha Chakravarthy, PhD (Department of Ophthalmology, Queen's University of Belfast, Royal Victoria Hospital, Northern Ireland); Mary Frances Cotch, PhD (Division of Epidemiology and Clinical Applications, National Eye Institute, USA); Johannes Vingerling, PhD, Paulus De Jong, PhD, M. Kamran Ikram, PhD (Departments of Epidemiology and Ophthalmology, Erasmus Medical Center, The Netherlands); Hata Zavrelova, MD, Giel Nijpels, PhD, Jacqueline M. Dekker, PhD (Department of Epidemiology and Biostatistics and the EMGO Institute for Health and Care Research, VU University Medical Center, The Netherlands); Astrid Fletcher, PhD (Department of Epidemiology and Population Health, London School of Hygiene and Tropical Medicine, England); Jakob Grauslund, PhD, Anne Katrin Sjølie, PhD (Department of Ophthalmology, Odense University Hospital, Odense, Denmark), Toke Bek, PhD (Department of Ophthalmology, Aarhus University Hospital, Aarhus, Denmark); Michael Stern, MD, Steven Haffner, MD (The University of Texas Health Science Center at San Antonio, USA); Richard F. Hamman, MD (Department of Epidemiology, Colorado School of Public Health, USA); Miho Yasuda, PhD, Tatsuro Ishibashi, PhD (Department of Ophthalmology, Graduate School of Medical Sciences, Kyushu University, Japan), Yutaka Kiyohara, PhD (Department of Environmental Medicine, Graduate School of Medical Sciences, Kyushu University, Japan); Richard A. Jensen, MD (Cardiovascular Health Research Unit, School of Medicine, and the Department of Epidemiology, School of Public Health, University of Washington, USA); Jost B. Jonas, PhD (Department of Ophthalmology, Medical Faculty Mannheim, Ruprecht-Karls-University, Heidelberg, Germany); Takeo Kato, PhD, Hidetoshi Yamashita, PhD, Takamasa Kayama, PhD (Global Center of Excellence Research, Advanced Molecular Epidemiology Research Institute, Yamagata University, Japan); Beatriz Munoz, MS, Joanna Katz, ScD (International health, Epidemiology, Biostatistics and Ophthalmology, Johns Hopkins University Bloomberg School of Public Health, USA), Sheila West, PhD (Dana Center for Preventive Ophthalmology, Wilmer Eye Institute, Johns Hopkins University, USA), James M. Tielsch, PhD (International Health, Johns Hopkins University Bloomberg School of Public Health, USA), David Friedman, PhD (Wilmer Eye Institute, Johns Hopkins University, USA); Ronald Klein, MD, Barbara EK Klein, MD (Department of Ophthalmology and Visual Sciences, University of Wisconsin School of Medicine and Public Health, USA); Sannapaneni Krishnaiah, MSc (Center for Clinical Epidemiology and Biostatistics, L V Prasad Eye Institute, India); Donna M. Lehman, PhD (Department of Medicine, University of Texas Health Science Center, USA); Catherine McCarty, PhD (The Center for Human Genetics Marshfield Clinic Research Foundation, USA); Rachel G. Miller, MS (EDC Study and GLB Program, University of Pittsburgh, USA); Trevor Orchard, MD (Department of Epidemiology, Graduate School of Public Health, University of Pittsburgh, USA);

## SUPPLEMENTARY DATA

Rajendra Pradeepa, MSc, Rema Mohan, PhD, Viswanathan Mohan, PhD (Department of Ophthalmology, Madras Diabetes Research Foundation, Chennai, India); Joseph Paul O'Hare, FRCP (Clinical Sciences Research Institute, Warwick Medical School, University of Warwick, Coventry, U.K); Neil T. Raymond, MSc (Department of Epidemiology, University of Warwick, UK); BCP Polak, PhD (VU University Medical Center, The Netherlands); Jie Jin Wang, PhD, Paul Mitchell, PhD, Elena Rochtchina, MAppStat (Centre for Vision Research, Westmead Hospital, University of Sydney, Australia); Monique S. Roy, MD (Institute of Ophthalmology and Visual Science, University of New Jersey, USA); Rajiv Raman, MS, Tarun Sharma, MD (Shri Bhagwan Mahavir Vitreoretinal Services, Sankara Nethralaya, India); Mina Torres, MS, Rohit Varma, MD (Doheny Eye Institute, Keck School of Medicine, University of Southern California, USA); Johan Seland, MD (Eye Centres, University of Bergen, Bergen); Jesus Vioque, PhD (Departamento de Salud Pública, Campus San Juan, Universidad Miguel Hernández, Spain); Feng Hua Wang, MD, Ning Li Wang, PhD, Yuan Bo Liang, PhD (Beijing Tongren Eye Center, Beijing Tongren Hospital, Capital Medical University, China); Qi Sheng You, MD, Liang Xu, MD, Xing Yuan Zhang, MD, Ya Xing Wang, MD (Beijing Institute of Ophthalmology, Beijing Tongren Hospital, Capital Medical University); Ian Young, MD (Centre for Public Health, School of Medicine, Dentistry and Biomedical Sciences, Royal Victoria Hospital, Belfast, Northern Ireland); Xinzhi Zhang, PhD (Centers for Disease Control and Prevention, USA); Hugh R. Taylor, MD, AC (Melbourne School of Population Health, University of Melbourne); David S. Siscovick, MD (Department of Medicine and Epidemiology, University of Washington, School of Public Health, USA); Coen DA Stehouwer, PhD (Department of Internal Medicine, Maastricht University Medical Centre and Cardiovascular Research Institute Maastricht, The Netherlands); Mati Rahu, PhD (Department of Epidemiology and Biostatistics, National Institute for Health Development, Tallinn, Estonia); Gisele Soubrane, PhD (Creteil University Eye Clinic, University of Paris XII, France); Laura Tomazzoli, MD (Università degli studi di Verona, Verona); Fotis Topouzis, MD (Aristotle University of Thessaloniki, Greece); Jonathan Shaw, MD and Paul Zimmet, AO (Baker IDI Heart and Diabetes Institute, Australia)

## SUPPLEMENTARY DATA

**Supplementary Table 1. Appraisal of Study Methodology**

| Quality Criteria                                                                                                                                                                                                                                                                                                                                                                                                                                                                                               | Maximum score |
|----------------------------------------------------------------------------------------------------------------------------------------------------------------------------------------------------------------------------------------------------------------------------------------------------------------------------------------------------------------------------------------------------------------------------------------------------------------------------------------------------------------|---------------|
| Representation of the general diabetes population. Participants selected should be representative of the general diabetes population of a defined area, and methods of achieving this may involve using population registries, electoral roles, inhabitants of a defined area, or people registered with general practices of a defined area. Participants attending health checkups or respondents to health screening invitations may be biased and cover only certain population groups                     | 1 point       |
| Appropriate method of ascertaining diabetes population. Appropriate inclusion of all persons with diabetes is important for accurate DR prevalence estimates. This may be defined on the basis of a positive laboratory test (i.e. an oral glucose tolerance test or fasting blood glucose) and/or a self-reported history of physician's diagnosis and current diabetes treatment. A review of medical records or use of a national health registry to identify individuals with diabetes is also appropriate | 3 points      |
| Appropriate assessment of outcome. In this case, retinal photography must be performed on all study participants diagnosed with diabetes. Retinal photography should not be limited to participants who have been diagnosed with DR from a clinical examination for where photographs served only as documentation of clinical findings                                                                                                                                                                        | 1 point       |
| Assessment of DR in both eyes. Studies that photographed only 1 randomly selected eye may miss detecting DR in the opposite eye                                                                                                                                                                                                                                                                                                                                                                                | 2 points      |
| Number of retinal fields photographed                                                                                                                                                                                                                                                                                                                                                                                                                                                                          | 3 points      |
| Photographic based grading of DR and DME based on standardized protocols and definitions, such as the ETDRS, modified ETDRS, modified Airlie House, WESDR, AAO or EURODIAB classification schemes                                                                                                                                                                                                                                                                                                              | 1 point       |

SUPPLEMENTARY DATA

Supplementary Table 2. Characteristics of Included Study Populations

| Study           | Study Design    | DM diagnosis                | DR data provided                            | DME data provided | Methodology score |
|-----------------|-----------------|-----------------------------|---------------------------------------------|-------------------|-------------------|
| ADDITION        | DM study        | OGTT                        | 2 eyes; 5 severity categories               | 2 eyes            | 9                 |
| ARIC            | CVD study       | FBG/RBG/ SR                 | 1 eye; modified ETDRS                       | 1 eye             | 8                 |
| Aarhus          | DM study        | Registry                    | 2 eyes; 5 severity categories               | 2 eyes            | 9                 |
| Andhra Pradesh  | Eye study       | SR                          | 1 eye; 5 severity categories                | 2 eyes            | 6                 |
| AusDiab         | DM study        | OGTT/SR                     | 2 eyes; 5 severity categories               | 2 eyes            | 10                |
| BDES            | Eye study       | SR/RBG/HbA <sub>1C</sub>    | 2 eyes; modified ETDRS                      | 2 eyes            | 11                |
| BES             | Eye study       | SR                          | 2 eyes; yes/no                              | No data           | 7                 |
| BMES            | Eye study       | FBG/SR                      | 2 eyes; ETDRS scale                         | 2 eyes            | 10                |
| Beijing         | Eye study       | FBG/SR                      | 1 eye; ETDRS scale                          | 1 eye             | 10                |
| CHS             | CVD study       | FBG/SR                      | 1 eye; ETDRS scale                          | 1 eye             | 8                 |
| CURES E.S.      | Eye study       | SR/2hBG                     | Worse eye; 5 severity categories            | 1 eye             | 10                |
| EDC             | DM study        | MR                          | 2 eyes; non-standard severity categories    | 1 eye             | 10                |
| EUREYE          | Eye study       | SR                          | 2 eyes; yes/no                              | No data           | 7                 |
| Funagata        | Eye study       | OGTT/SR                     | 1 eye; ETDRS scale                          | 1 eye             | 8                 |
| Fyn             | DM study        | Registry                    | 2 eyes; ETDRS scale                         | 2 eyes            | 11                |
| Handan          | Eye study       | FBG/SR                      | 2 eyes; ETDRS scale                         | 2 eyes            | 10                |
| Hisayama        | Eye study       | OGTT/SR                     | 2 eyes; non-standard severity categories    | No data           | 9                 |
| Hoorn           | DM study        | OGTT/SR                     | 2 eyes; non-standard severity categories    | 2 eyes            | 10                |
| LALES           | Eye study       | SR/ HbA <sub>1C</sub> / RBG | 1 eye; non-standard severity categories     | 1 eye             | 11                |
| MESA            | CVD study       | FBG/SR                      | 2 eyes; ETDRS scale                         | 2 eyes            | 8                 |
| MVIP            | Eye study       | SR                          | 1 eye; yes/no                               | 2 eyes            | 8                 |
| NHANES          | National survey | SR/ HbA <sub>1C</sub>       | Worse eye; modified ETDRS                   | 2 eyes            | 9                 |
| New Jersey 725  | DM study        | MR                          | 1 eye; modified ETDRS                       | 1 eye             | 11                |
| Proyecto VER    | Eye study       | SR/ HbA <sub>1C</sub>       | Worst eye; modified ETDRS                   | 1 eye             | 9                 |
| Rotterdam       | Eye study       | SR/RBG/ 2hBG                | 2 eye; yes/no                               | No data           | 8                 |
| SINDI           | Eye study       | RBG/SR                      | 1 eye; yes/no                               | 2 eyes            | 10                |
| SNDREAMS        | DR study        | SR/ FBG                     | 1 eye; 5 severity categories                | 1 eye             | 11                |
| Samutsakhon     | DM study        | SR, HbA <sub>1C</sub>       | Worse eye; non-standard severity categories | No data           | 9                 |
| San Antonio     | CVD study       | OGTT, SR                    | 1 eye; non-standard severity categories     | No data           | 11                |
| San Luis Valley | DM study        | OGTT , SR                   | Worse eye; modified ETDRS                   | 1 eye             | 9                 |
| Shihpai         | Eye study       | SR                          | Worse eye; 5 severity categories            | 1 eye             | 8                 |
| SIMES           | Eye study       | RBG, SR                     | 2 eyes; 5 severity categories               | 2 eyes            | 10                |
| Turin           | DM study        | MR, registry                | 1 eye; non-standard severity categories     | 1 eye             | 10                |
| UKADS           | DM study        | MR                          | 1 eye; non-standard severity categories     | 1 eye             | 9                 |
| WESDR           | DR study        | MR                          | Worse eye; 5 severity categories            | 1 eye             | 11                |

Abbreviations: CVD, cardiovascular disease; DM, diabetes mellitus; DR, diabetic retinopathy; FBG, fasting blood glucose; Hx, history; MR, medical records; NR, not reported; OGTT, oral glucose tolerance test; RBG, random blood glucose; SR, self-report, which includes self-reported history of physician diagnosis or use of diabetes medications; Tx, treatment; 2hBG, 2-hour post-load blood glucose. ADDITION, Anglo-Danish-Dutch study of Intensive Treatment in People with Screen-detected Diabetes in Primary Care; ARIC, Atherosclerosis Risk in Communities Study; Andhra Pradesh, Andhra Pradesh Eye Disease

## SUPPLEMENTARY DATA

Study; AusDiab, Australian Diabetes, Obesity and Lifestyle Study; BDES, Beaver Dam Eye Study; BES, Baltimore Eye Survey; BMES, Blue Mountains Eye Study; Beijing, Beijing Eye Study; CHS, Cardiovascular Health Study; CURES ES, Chennai Urban Rural Epidemiology Study (Eye Study); EDC, Pittsburgh Epidemiology of Diabetes Complications Study; EUREYE; European Eye Study; Funagata, Funagata Study; Handan, Handan Eye Study; Hisayama, Hisayama Study; Hoorn, Hoorn Study; LALES, Los Angeles Latino Eye Study; MESA, Multi-ethnic Study of Atherosclerosis; MVIP, Melbourne Vision Impairment Project; NHANES, National Health and Nutrition Examination Survey; Project VER, Proyecto Vision and Eye Research; Rotterdam, Rotterdam Study; SiMES, Singapore Malay Eye Study; SINDI, Singapore Indian Eye Study; SNDREAMS, Sankara Nethralaya Diabetic Retinopathy Epidemiology and Molecular Genetics Study; UKADS, UK Asian Diabetes Study; WESDR, Wisconsin Epidemiologic Study of Diabetic Retinopathy.

SUPPLEMENTARY DATA

Supplementary Table 3. Age-Standardized Prevalence of Diabetic Retinopathy by Study in Diabetic Subjects Aged 20 to 79 years

| Study         | Eyes/<br>subject | Fields/<br>eye | Any DR     |           | PDR        |           | DME        |           | VTDR       |           | Age-Standardised Prevalence per 100 (95% CI) |                      |                      |                      |
|---------------|------------------|----------------|------------|-----------|------------|-----------|------------|-----------|------------|-----------|----------------------------------------------|----------------------|----------------------|----------------------|
|               |                  |                | N<br>(tot) | N<br>(DR) | N<br>(tot) | N<br>(DR) | N<br>(tot) | N<br>(DR) | N<br>(tot) | N<br>(DR) | Any DR                                       | PDR                  | DME                  | VTDR                 |
| By Study      |                  |                |            |           |            |           |            |           |            |           |                                              |                      |                      |                      |
| Aarhus        | Both             | 2              | 206        | 50        | 205        | 4         | 205        | 5         | 206        | 8         | 24.71 (23.08, 26.34)                         | 1.58 (1.33, 1.84)    | 2.26 (1.94, 2.59)    | 3.14 (2.78, 3.5)     |
| ADDITION      | Both             | 2              | 534        | 61        | 534        | 0         | 533        | 5         | 534        | 5         | 9.53 (9.12, 9.95)                            | 0 (0, 0.66)          | 0.91 (0.77, 1.04)    | 0.9 (0.77, 1.04)     |
| AndhraPradesh | One              | 2              | 203        | 36        | 203        | 0         | 203        | 5         | 203        | 5         | 15.7 (14.91, 16.49)                          | 0 (0, 1.72)          | 2.21 (1.91, 2.51)    | 2.21 (1.91, 2.51)    |
| ARIC          | One              | 1              | 1652       | 276       | 1550       | 14        | 1609       | 10        | 1652       | 23        | 14.13 (13.87, 14.39)                         | 0.84 (0.78, 0.91)    | 0.54 (0.49, 0.59)    | 1.27 (1.19, 1.35)    |
| AusDiab       | Both             | 2              | 723        | 106       | 723        | 12        | 722        | 16        | 723        | 21        | 13.92 (13.33, 14.51)                         | 1.78 (1.52, 2.04)    | 2.43 (2.08, 2.78)    | 3.04 (2.69, 3.4)     |
| BDES          | Both             | 3              | 454        | 146       | 454        | 8         | 451        | 13        | 454        | 19        | 25.64 (24.94, 26.35)                         | 1.18 (1.04, 1.32)    | 2.22 (2.01, 2.42)    | 3.14 (2.9, 3.38)     |
| Beijing       | One              | 2              | 345        | 96        | 345        | 15        | 345        | 10        | 345        | 20        | 22.44 (21.66, 23.21)                         | 3.53 (3.23, 3.84)    | 3.04 (2.73, 3.35)    | 4.91 (4.54, 5.27)    |
| BES           | Both             | 2              | 461        | 116       | NR         | NR        | NR         | NR        | NA         | NA        | 21.8 (21.19, 22.41) †                        | NR                   | NR                   | NA                   |
| BMES          | Both             | 6              | 244        | 62        | 243        | 4         | 244        | 12        | 244        | 15        | 22.71 (21.63, 23.79)                         | 1.49 (1.21, 1.77)    | 4.46 (3.98, 4.95)    | 5.75 (5.2, 6.31)     |
| CHS           | One              | 1              | 247        | 41        | 221        | 6         | 243        | 5         | 247        | 8         | 6.32 (6, 6.63)                               | 1.03 (0.9, 1.17)     | 0.78 (0.67, 0.89)    | 1.23 (1.09, 1.37)    |
| CURES E.S.    | Worse            | 4              | 1707       | 302       | 1707       | 16        | 1707       | 90        | 1707       | 106       | 17.69 (17.34, 18.04)                         | 1.03 (0.94, 1.12)    | 5.14 (4.96, 5.33)    | 6.17 (5.97, 6.38)    |
| EDC           | Both             | 3              | 547        | 514       | 537        | 196       | 547        | 127       | 547        | 225       | 59.91 (57.89, 61.93)                         | 32.37 (30.8, 33.94)  | 15.19 (14.17, 16.21) | 35.63 (34.01, 37.25) |
| EUREYE        | Both             | 2              | 559        | 109       | NR         | NR        | NR         | NR        | NA         | NA        | 7.42 (7.19, 7.65) †                          | NR                   | NR                   | NA                   |
| Funagata      | One              | 1              | 156        | 22        | 156        | 5         | 154        | 0         | 156        | 5         | 12.31 (11.38, 13.23)                         | 2.5 (2.1, 2.89)      | 0 (0, 2.27)          | 2.5 (2.1, 2.89)      |
| Fyn           | Both             | 9              | 192        | 186       | 192        | 96        | 189        | 15        | 192        | 101       | 97.24 (92.97, 101.51)                        | 49.68 (46.66, 52.7)  | 10.35 (8.35, 12.35)  | 52.06 (49.02, 55.1)  |
| Handan        | Both             | 2              | 366        | 98        | 366        | 6         | 183        | 20        | 366        | 21        | 25.04 (24.08, 26)                            | 2.14 (1.65, 2.62)    | 11.7 (10.27, 13.14)  | 5.76 (5.2, 6.32)     |
| Hisayama      | Both             | 1              | 274        | 43        | 274        | 5         | NR         | NR        | NA         | NA        | 13.06 (12.36, 13.75) †                       | 0.95 (0.81, 1.08)    | NR                   | NA                   |
| Hoon          | Both             | 2              | 125        | 30        | 125        | 1         | NR         | NR        | NA         | NA        | 19.64 (18.28, 20.99) †                       | 0.39 (0.26, 0.51)*   | NR                   | NA                   |
| LALES         | One              | 7              | 1190       | 562       | 1188       | 73        | 1183       | 126       | 1190       | 167       | 40.03 (39.51, 40.54)*                        | 5.25 (5.07, 5.44)    | 8.99 (8.75, 9.24)    | 11.91 (11.63, 12.19) |
| MESA          | Both             | 2              | 850        | 216       | 849        | 20        | 828        | 67        | 850        | 76        | 22.64 (22.14, 23.15)                         | 1.96 (1.82, 2.11)    | 6.81 (6.53, 7.08)    | 7.59 (7.3, 7.88)     |
| MVIP          | Both             | 2              | 211        | 60        | 211        | 9         | 211        | 14        | 211        | 18        | 24.55 (23.48, 25.61)                         | 4.71 (4.21, 5.22)    | 5.04 (4.58, 5.5)     | 7.99 (7.36, 8.61)    |
| NewJersey725  | One              | 7              | 355        | 253       | 348        | 46        | 355        | 48        | 355        | 75        | 54.44 (52.74, 56.15)                         | 16.88 (15.88, 17.88) | 14.58 (13.66, 15.49) | 25.92 (24.69, 27.15) |
| NHANES        | Worse            | 2              | 937        | 268       | 937        | 22        | 935        | 35        | 937        | 54        | 24.14 (23.68, 24.59)                         | 1.83 (1.7, 1.95)     | 3.25 (3.08, 3.42)    | 4.76 (4.56, 4.96)    |
| ProyectoVER   | One              | 3              | 885        | 424       | 883        | 57        | 875        | 66        | 885        | 102       | 40.14 (39.54, 40.73)                         | 5.35 (5.14, 5.57)    | 6.4 (6.16, 6.64)     | 9.68 (9.39, 9.97)    |
| Rotterdam     | Both             | 2              | 486        | 76        | NR         | NR        | NR         | NR        | NA         | NA        | 13.91 (13.11, 14.72) †                       | NR                   | NR                   | NA                   |
| SAHS          | One              | 7              | 381        | 153       | 381        | 16        | NR         | NR        | NA         | NA        | 38.31 (37.29, 39.32) †                       | 3.96 (3.65, 4.26)    | NR                   | NA                   |
| Samutsakhon   | One              | 7              | 96         | 11        | 96         | 3         | NR         | NR        | NA         | NA        | 10.02 (9.1, 10.93) †                         | 2.43 (1.98, 2.87)    | NR                   | NA                   |
| SanLuisValley | Worse            | 3              | 392        | 129       | 389        | 17        | 368        | 11        | 392        | 23        | 33.64 (32.44, 34.83)                         | 4.3 (3.92, 4.69)     | 2.74 (2.49, 2.99)    | 5.66 (5.24, 6.09)    |
| Shihpai       | Worse            | 2              | 139        | 18        | 139        | 3         | 139        | 7         | 139        | 10        | 4.93 (4.56, 5.3)                             | 0.82 (0.67, 0.97)    | 1.92 (1.69, 2.15)    | 2.74 (2.46, 3.01)    |
| SiMES         | Both             | 2              | 757        | 268       | NR         | NR        | 757        | 44        | NA         | NA        | 29.47 (28.9, 30.03)                          | NR                   | 4.69 (4.46, 4.91)    | NA                   |
| SINDI         | One              | 2              | 1075       | 163       | NR         | NR        | 1075       | 44        | NA         | NA        | 12 (11.71, 12.29)                            | NR                   | 3.57 (3.41, 3.74)    | NA                   |
| SNDREAMS      | One              | 4              | 1393       | 261       | 1393       | 21        | 1393       | 46        | 1393       | 59        | 15.95 (15.65, 16.26)                         | 1.33 (1.24, 1.42)    | 2.82 (2.7, 2.95)     | 3.67 (3.52, 3.82)    |
| Turin         | One              | 2              | 310        | 131       | 310        | 9         | 310        | 24        | 310        | 33        | 69.13 (56.97, 81.3)                          | 3.74 (3.24, 4.24)    | 5.46 (4.89, 6.02)*   | 9.2 (8.44, 9.96)     |
| UKADS         | One              | 2              | 910        | 369       | 910        | 127       | 910        | 94        | 910        | 127       | 39.74 (38.61, 40.87)                         | 13.96 (13.24, 14.68) | 10.38 (9.78, 10.98)  | 13.96 (13.24, 14.68) |
| WESDR         | Worse            | 7              | 1930       | 1292      | 1930       | 331       | 1577       | 212       | 1930       | 427       | 66.59 (65.94, 67.24)                         | 18.01 (17.67, 18.36) | 14.21 (13.88, 14.54) | 23.35 (22.96, 23.74) |

## SUPPLEMENTARY DATA

Abbreviations: DME: Diabetic Macular Edema; DR: Diabetic Retinopathy; NR: Not reported; NA: Not applicable; PDR: Proliferative Diabetic Retinopathy; VTDR: Vision-threatening Diabetic Retinopathy. ADDITION, Anglo-Danish-Dutch study of Intensive Treatment in People with Screen-detected Diabetes in Primary Care; ARIC, Atherosclerosis Risk in Communities Study; Andhra Pradesh, Andhra Pradesh Eye Disease Study; AusDiab, Australian Diabetes, Obesity and Lifestyle Study; BDES, Beaver Dam Eye Study; BES, Baltimore Eye Survey; BMES, Blue Mountains Eye Study; Beijing, Beijing Eye Study; CHS, Cardiovascular Health Study; CURES ES, Chennai Urban Rural Epidemiology Study (Eye Study); EDC, Pittsburgh Epidemiology of Diabetes Complications Study; EUREYE, European Eye Study; Funagata, Funagata Study; Handan, Handan Eye Study; Hisayama, Hisayama Study; Hoorn, Hoorn Study; LALES, Los Angeles Latino Eye Study; MESA, Multi-ethnic Study of Atherosclerosis; MVIP, Melbourne Vision Impairment Project; NHANES, National Health and Nutrition Examination Survey; Proyecto VER, Proyecto Vision and Eye Research; Rotterdam, Rotterdam Study; SiMES, Singapore Malay Eye Study; SINDI, Singapore Indian Eye Study; SNDREAMS, Sankara Nethralaya Diabetic Retinopathy Epidemiology and Molecular Genetics Study; UKADS, UK Asian Diabetes Study; WESDR, Wisconsin Epidemiologic Study of Diabetic Retinopathy.

† Our 'any DR' definition includes DME information. Studies that did not provide DME data (BES, EUREYE, Hisayama, Hoorn, Rotterdam, SAHS and Samutsakhon) may have higher prevalence estimates for any DR than that reported here.
